# Supplementary material for: Skin-inspired environment-tolerant organohydrogel sensors with balanced mechanical and electrical properties for human motion and physiological signal monitoring
Source: Royal Society of Chemistry journal article supplement (doi:10.1039/d3tc03533f), 2023-01-01
Supplement: d3tc03533f1.pdf [file d3tc03533f1.pdf]

## Electronic Supplementary Information

### **Skin-inspired environment-tolerant organohydrogel sensors with balanced mechanical and electrical properties for human motion and physiological signal monitoring**

Wenshuai Zhang,<sup>a</sup> Lingxiao Xu,<sup>b,\*</sup> Cui Lv,<sup>c</sup> Peipei Sun,<sup>a,\*</sup> Lei Shi<sup>a,\*</sup>

*a. State Key Laboratory of Biobased Material and Green Papermaking, Advanced Materials Institute, Qilu University of Technology (Shandong Academy of Sciences), Jinan 250353, China.*

*b. Jinan Tonglu Pharmaceutical Technology and Development Co., LTD, Jinan 250101, China.*

*c. Laboratory of Immunology for Environment and Health, Shandong Analysis and Test Center, School of Pharmaceutical Sciences, Qilu University of Technology (Shandong Academy of Sciences), Jinan 250014, China.*

\*Corresponding authors: xulingxiao202303@163.com (L. Xu); sunpeipei@sdas.org (P. Sun);

lshi@qlu.edu.cn (L. Shi).

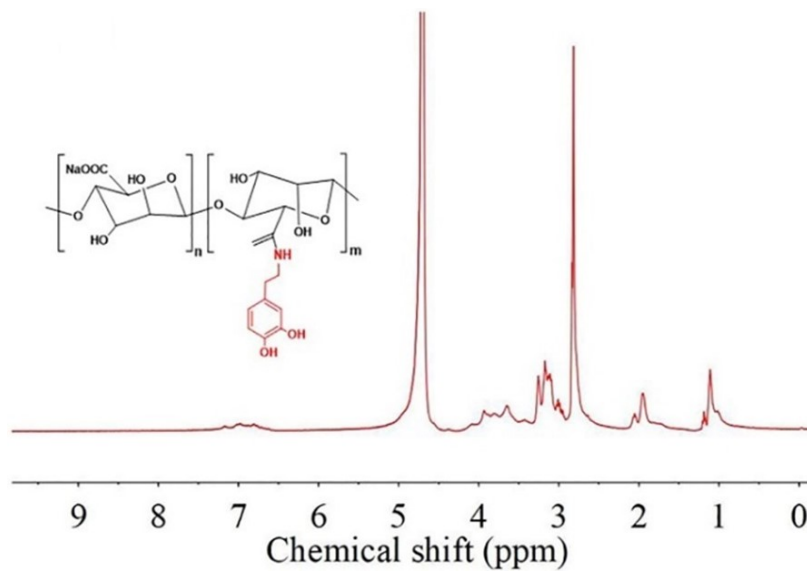

**Fig. S1.**  $^1\text{H}$  NMR spectrum of Alg-PBA.

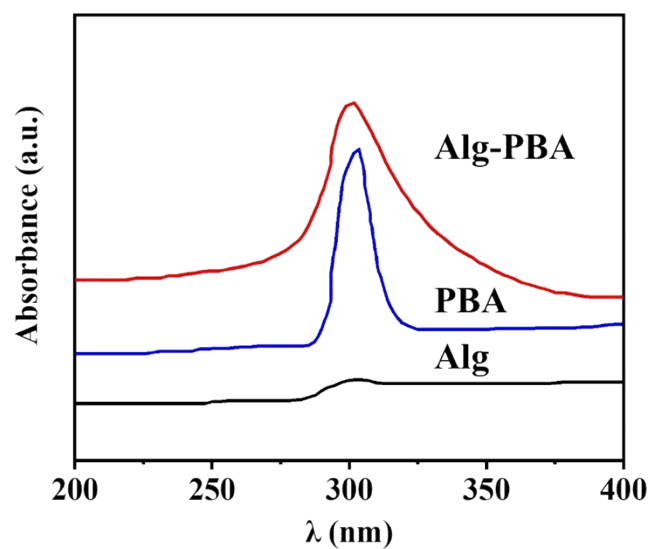

**Fig. S2.** UV-vis spectra of Alg, PBA, and Alg-PBA.

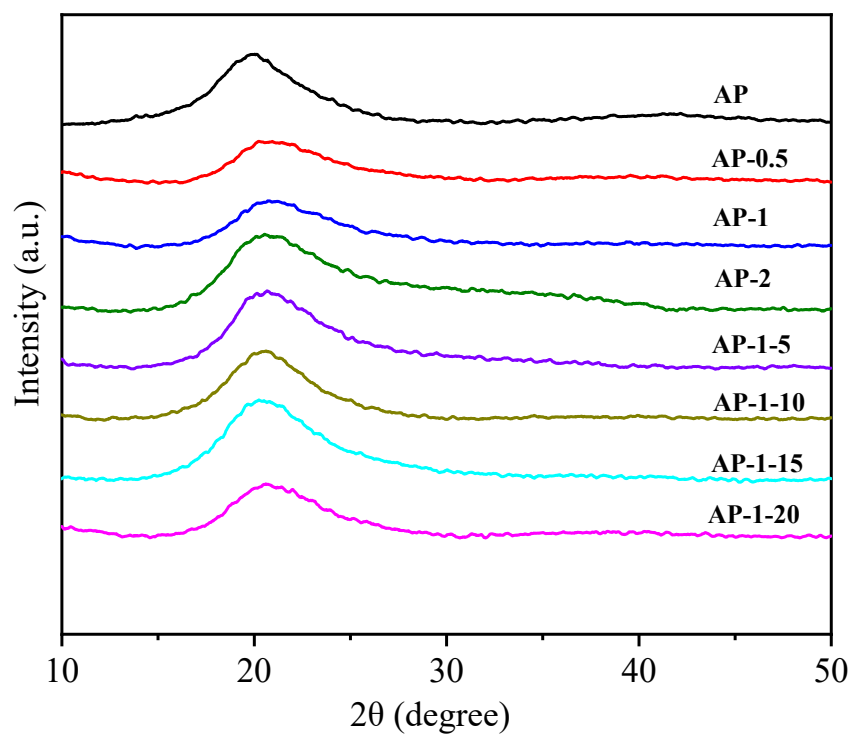

**Fig. S3.** XRD patterns of lyophilized AP hydrogel, AP-x and AP-x-y organohydrogels.

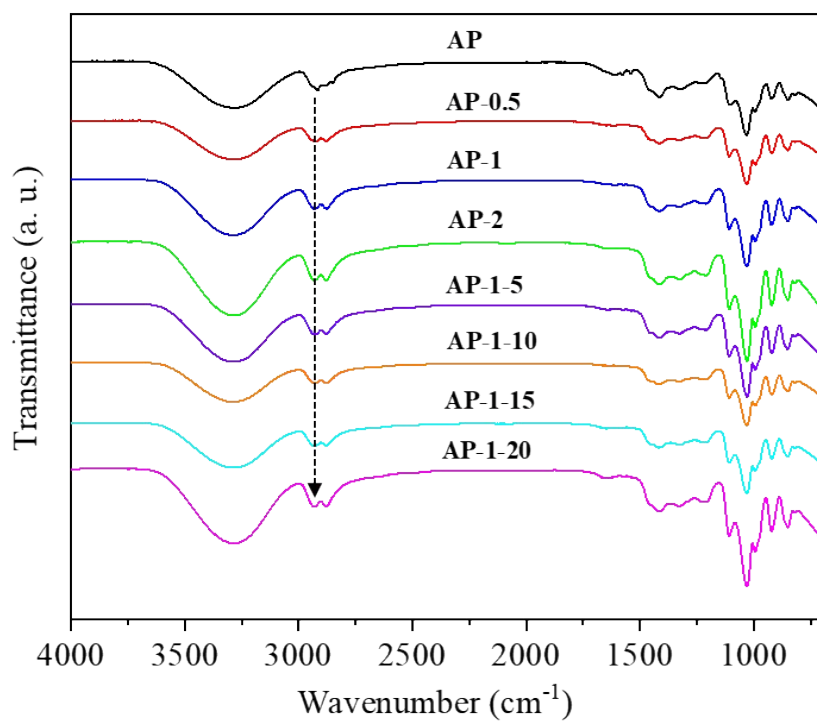

**Fig. S4.** FT-IR spectra of lyophilized AP hydrogel, AP-x and AP-x-y organohydrogels.

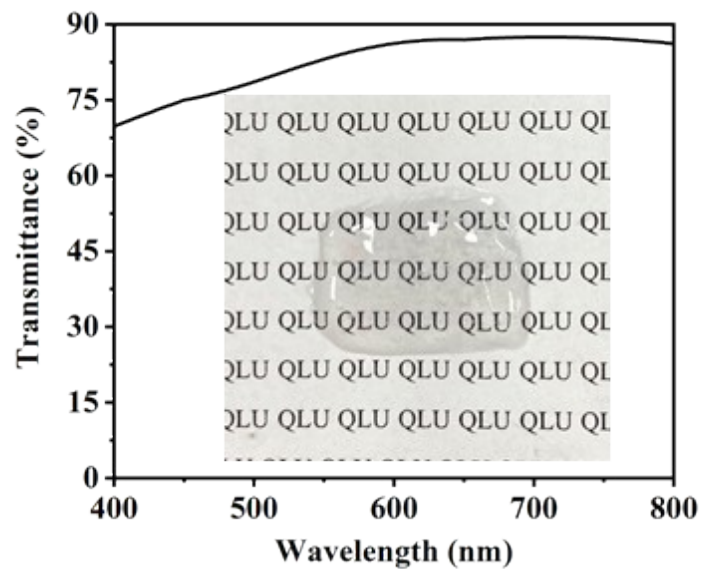

**Fig. S5.** Transmission spectra of the AP-1-15 organohydrogel. The inset shows the AP-1-15 organohydrogel on a paper.

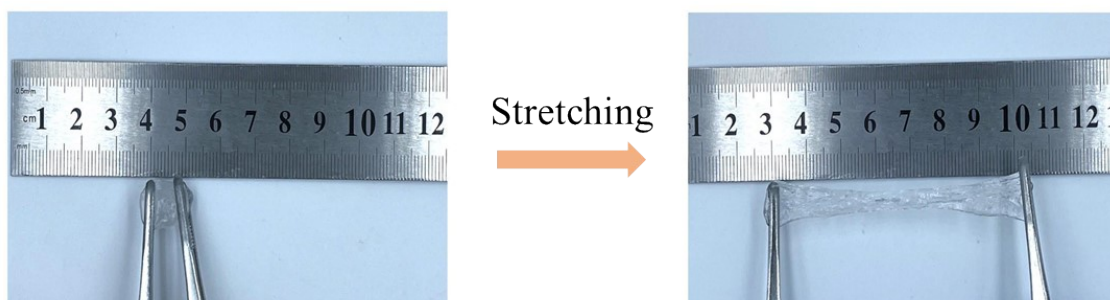

**Fig. S6.** Photos showing the AP-1-15 organohydrogel before and after stretching.

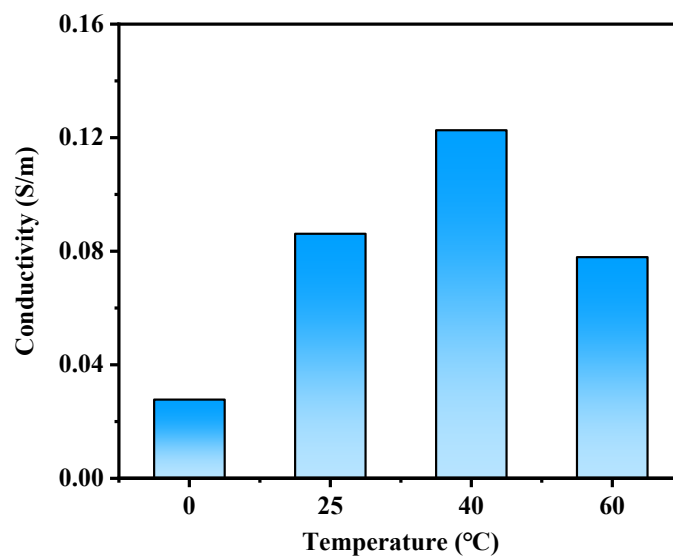

**Fig. S7.** The conductivities of AP-1-15 organohydrogel under different temperatures.

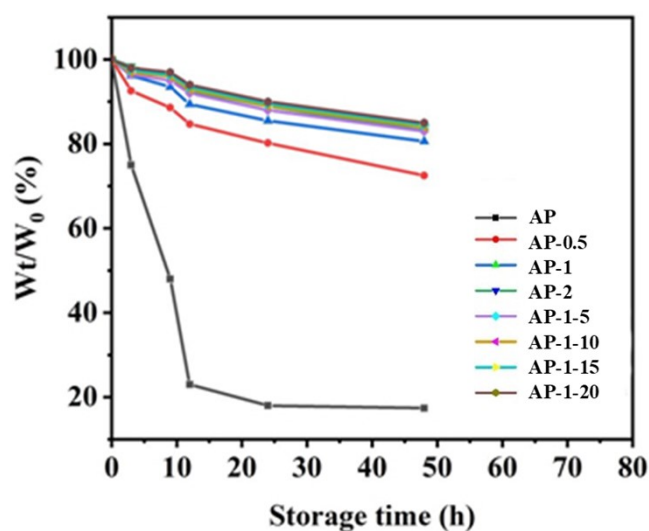

**Fig. S8.** The weight changes of the AP hydrogel, AP-x, and AP-x-y organohydrogels at 60 °C.

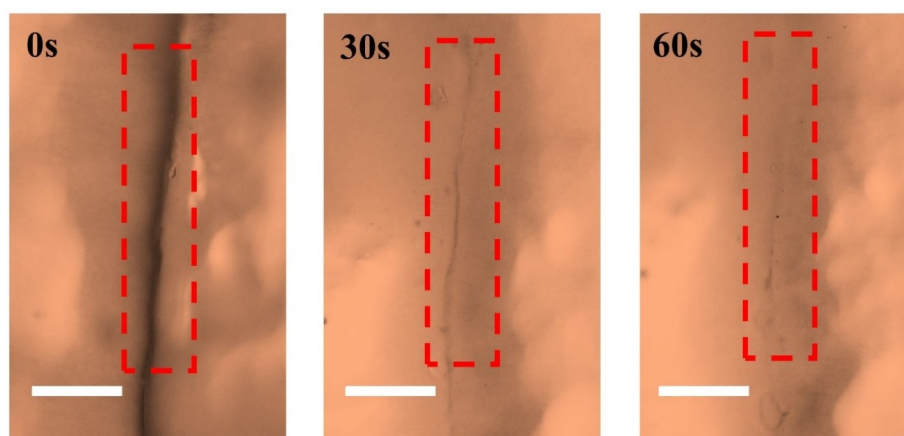

**Fig. S9.** Optical microscope images of the self-healing process of AP-1-15 organohydrogel after 60 s.

**Table S1.** The self-healing efficiencies of AP-1-15 organohydrogel after three successive healing processes.

| Samples                | Breaking stress <sup>a</sup> (kPa) | Self-healing efficiency <sup>b</sup> (%) |
|------------------------|------------------------------------|------------------------------------------|
| freshly prepared       | 59.2                               | –                                        |
| 1 <sup>st</sup> healed | 58.1                               | 98.2                                     |
| 2 <sup>nd</sup> healed | 57.0                               | 96.2                                     |
| 3 <sup>rd</sup> healed | 55.7                               | 93.8                                     |

<sup>a</sup>. The breaking stress values were obtained from tensile tests. <sup>b</sup>. Self-healing efficiencies were calculated by the breaking stress of healed sample divided by that of freshly prepared sample.

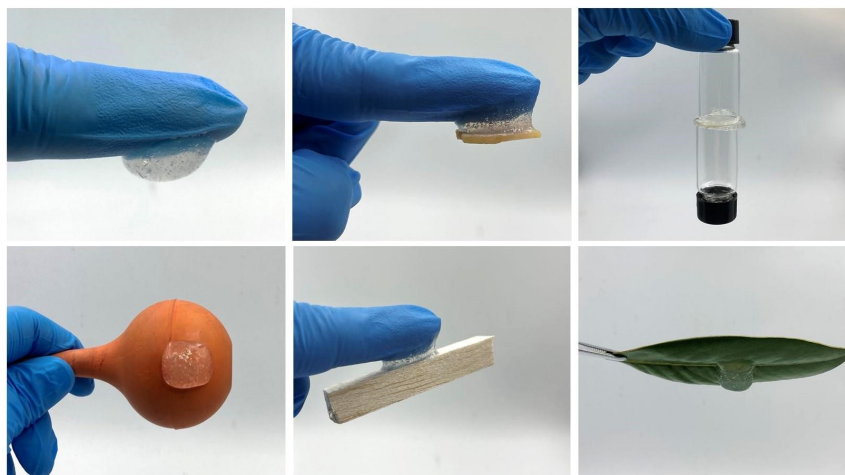

**Fig. S10.** Photos showing the adhesion behaviours of AP-1-15 organohydrogel on substrates including rubber glove, copper foil, glass, earwash ball, wood, and leaf.
